# Supplementary material
Source: MDPI journal article supplement (https://www.mdpi.com/2072-4292/15/5/1226)
Supplement: s1 [file s1]

**Supplementary Table S1.** Description of SPOT and KH satellite parameters.

| Platform        | Ground sample distance                    | Swath width | Bands |                         | Operation dates |
|-----------------|-------------------------------------------|-------------|-------|-------------------------|-----------------|
| SPOT 1          | Panchromatic: 10 m<br>Multispectral: 20 m | 60 km       | Pan   | 0.51-0.73 $\mu\text{m}$ | 02/1986-11/2003 |
|                 |                                           |             | Green | 0.50-0.59 $\mu\text{m}$ |                 |
|                 |                                           |             | Red   | 0.61-0.68 $\mu\text{m}$ |                 |
|                 |                                           |             | NIR   | 0.79-0.89 $\mu\text{m}$ |                 |
| SPOT 2          | Panchromatic: 10 m<br>Multispectral: 20 m | 60 km       | Pan   | 0.51-0.73 $\mu\text{m}$ | 01/1990-07/2009 |
|                 |                                           |             | Green | 0.50-0.59 $\mu\text{m}$ |                 |
|                 |                                           |             | Red   | 0.61-0.68 $\mu\text{m}$ |                 |
|                 |                                           |             | NIR   | 0.79-0.89 $\mu\text{m}$ |                 |
| SPOT 3          | Panchromatic: 10 m<br>Multispectral: 20 m | 60 km       | Pan   | 0.51-0.73 $\mu\text{m}$ | 09/1993-11/1996 |
|                 |                                           |             | Green | 0.50-0.59 $\mu\text{m}$ |                 |
|                 |                                           |             | Red   | 0.61-0.68 $\mu\text{m}$ |                 |
|                 |                                           |             | NIR   | 0.78-0.89 $\mu\text{m}$ |                 |
| SPOT 4          | Panchromatic: 10 m<br>Multispectral: 20 m | 60 km       | Pan   | 0.61-0.68 $\mu\text{m}$ | 03/1998-06/2013 |
|                 |                                           |             | Green | 0.50-0.59 $\mu\text{m}$ |                 |
|                 |                                           |             | Red   | 0.61-0.68 $\mu\text{m}$ |                 |
|                 |                                           |             | NIR   | 0.79-0.89 $\mu\text{m}$ |                 |
|                 |                                           |             | SWIR  | 1.58-1.75 $\mu\text{m}$ |                 |
| SPOT 5          | Panchromatic: 5 m<br>Multispectral: 10 m  | 60 km       | Pan   | 0.48-0.71 $\mu\text{m}$ | 05/2002-03/2015 |
|                 |                                           |             | Green | 0.50-0.59 $\mu\text{m}$ |                 |
|                 |                                           |             | Red   | 0.61-0.68 $\mu\text{m}$ |                 |
|                 |                                           |             | NIR   | 1.58-1.75 $\mu\text{m}$ |                 |
|                 |                                           |             | SWIR  | 1.58-1.75 $\mu\text{m}$ |                 |
| SPOT 6          | Panchromatic: 2 m<br>Multispectral: 8 m   | 10-60 km    | Pan   | 0.45-0.52 $\mu\text{m}$ | 09/2012-present |
|                 |                                           |             | Green | 0.53-0.60 $\mu\text{m}$ |                 |
|                 |                                           |             | Red   | 0.62-0.69 $\mu\text{m}$ |                 |
|                 |                                           |             | NIR   | 0.76-0.89 $\mu\text{m}$ |                 |
| SPOT 7          | Panchromatic: 2 m<br>Multispectral: 8 m   | 10-60 km    | Pan   | 0.45-0.52 $\mu\text{m}$ | 06/2014-present |
|                 |                                           |             | Green | 0.53-0.60 $\mu\text{m}$ |                 |
|                 |                                           |             | Red   | 0.62-0.69 $\mu\text{m}$ |                 |
|                 |                                           |             | NIR   | 0.76-0.89 $\mu\text{m}$ |                 |
| KH-4A<br>Corona | Panchromatic 2.7 m                        | n/a         | n/a   | n/a                     | 08/1963-09/1969 |
| KH-9<br>Hexagon | Panchromatic: 2.5 m                       | n/a         | n/a   | n/a                     | 08/1971-10/1984 |
